# Supplementary material for: Nano-TiO2 coated single-crystal LiNi0.65Co0.15Mn0.2O2 for lithium-ion batteries with a stable structure and excellent cycling performance at a high cut-off voltage
Source: Royal Society of Chemistry journal article supplement (doi:10.1039/d2ta00135g), 2022-01-01
Supplement: d2ta00135g1.pdf [file d2ta00135g1.pdf]

## Supporting Information

### **Nano-TiO<sub>2</sub> coated single-crystal LiNi<sub>0.65</sub>Co<sub>0.15</sub>Mn<sub>0.2</sub>O<sub>2</sub> for lithium-ion batteries with stable structure and excellent cycling performance at a high cut-off voltage**

Longzhen You,<sup>a</sup> Ya Wen,<sup>b</sup> Guangxin Li,<sup>c</sup> Binbin Chu,<sup>a</sup> Jianhua Wu,<sup>b</sup> Tao Huang\*<sup>c</sup> and Aishui Yu\*<sup>a</sup>

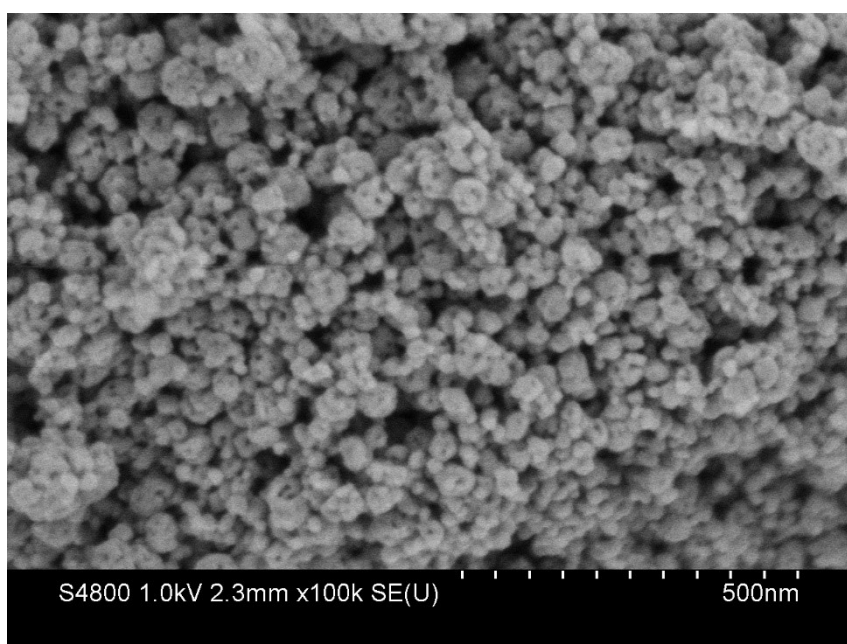

Fig. S1 SEM images of nano-TiO<sub>2</sub>

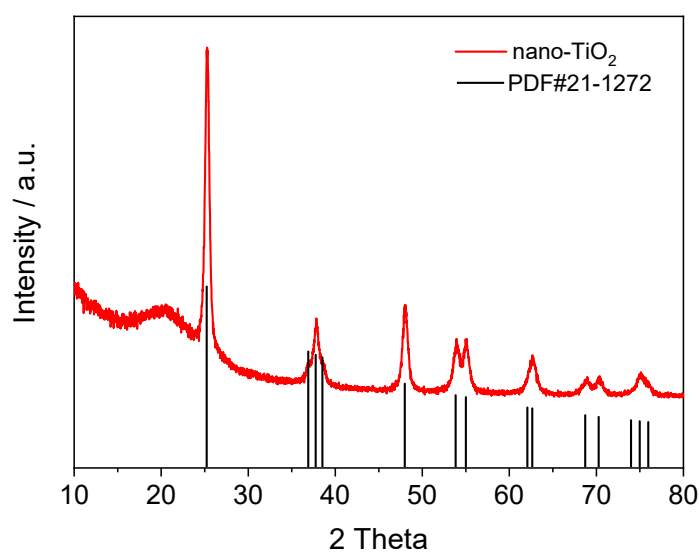

Fig. S2 XRD patterns of nano-TiO<sub>2</sub> and anatase TiO<sub>2</sub> (JCPDS no. 21-1272)

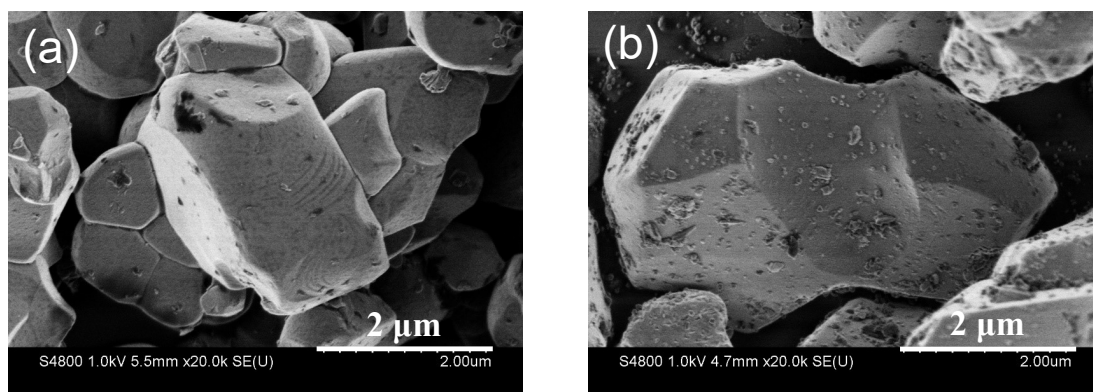

Fig. S3 The magnified SEM images of S-NCM65 and 5TS-NCM65

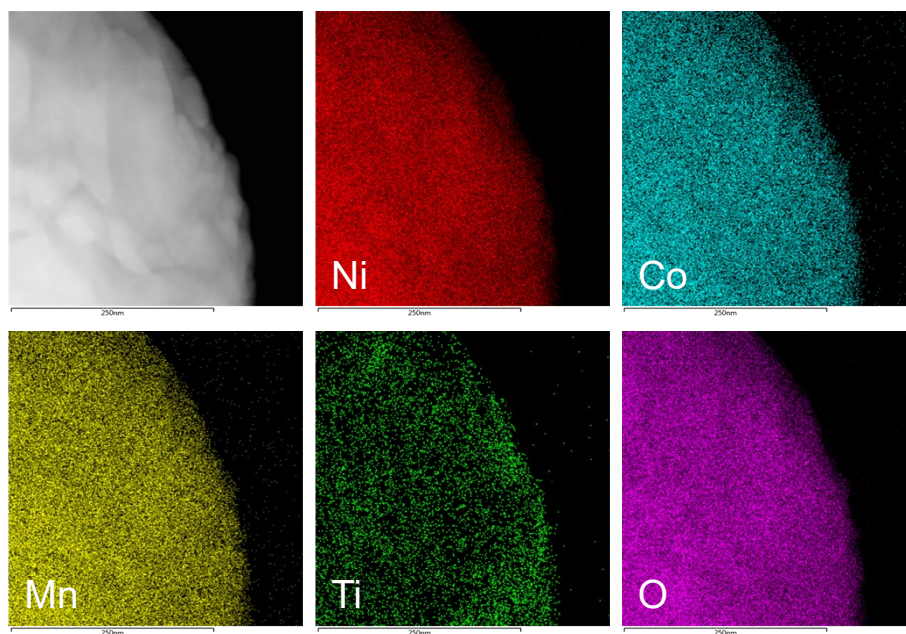

Fig. S4 EDS elemental mapping of selected area of 5TS-NCM65

Table S1 Content of selected elements and residual lithium

| Element  | Line Type | k Factor | Absorption Correction                              | Wt%    | Atomic % |
|----------|-----------|----------|----------------------------------------------------|--------|----------|
| O        | K series  | 1.260    | 1.00                                               | 42.03  | 71.6     |
| Ti       | K series  | 0.687    | 1.00                                               | 0.29   | 0.28     |
| Mn       | K series  | 0.732    | 1.00                                               | 11.37  | 5.64     |
| Co       | K series  | 0.762    | 1.00                                               | 9.19   | 4.25     |
| Ni       | K series  | 0.753    | 1.00                                               | 39.25  | 18.23    |
| Total:   |           |          |                                                    | 100.00 | 100.00   |
| Samples  |           |          | Residual lithium ( $\text{Li}_2\text{CO}_3$ , ppm) |        |          |
| S-NCM65  |           |          | 5695                                               |        |          |
| 5T-NCM65 |           |          | 3992                                               |        |          |

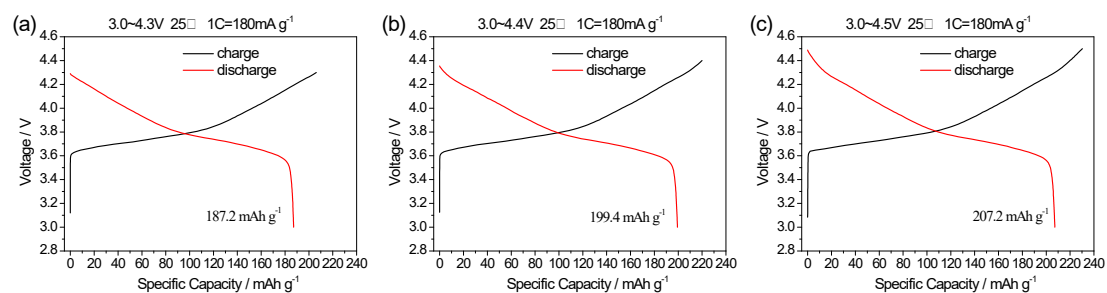

Fig. S5 Initial charge-discharge curves of P-NCM65 at 0.1C and 25°C in the voltage range of (a) 3.0-4.3 V, (b) 3.0-4.4 V and (c) 3.0-4.5 V, respectively

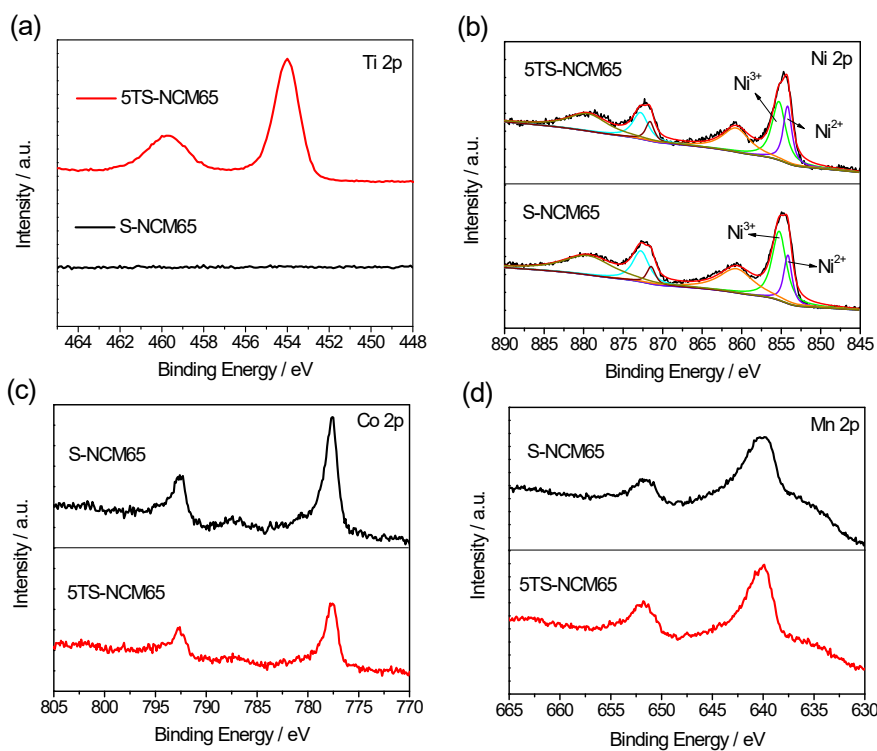

Fig. S6 XPS spectra of (a) Ti 2p, (b) Ni 2p, (c) Co 2p and (d) Mn 2p for S-NCM65 and 5TS-NCM65 cathode. XPS, X-ray photoelectron spectroscopy.

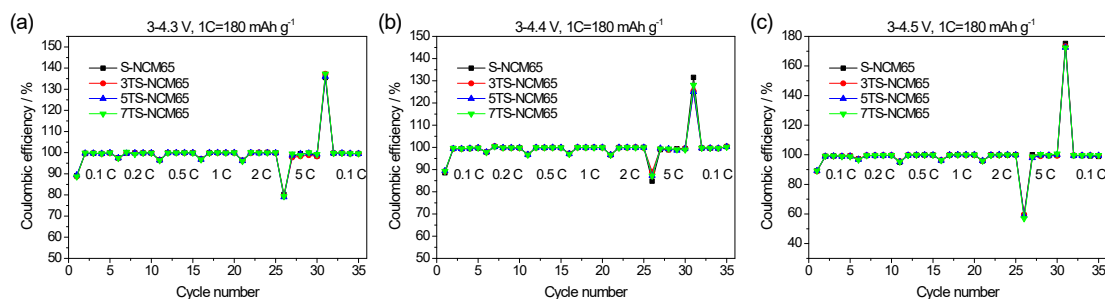

Fig. S7 Coulombic efficiencies of each sample at 25°C in the voltage range of (a) 3.0-4.3 V, (b) 3.0-4.4 V and (c) 3.0-4.5 V, respectively

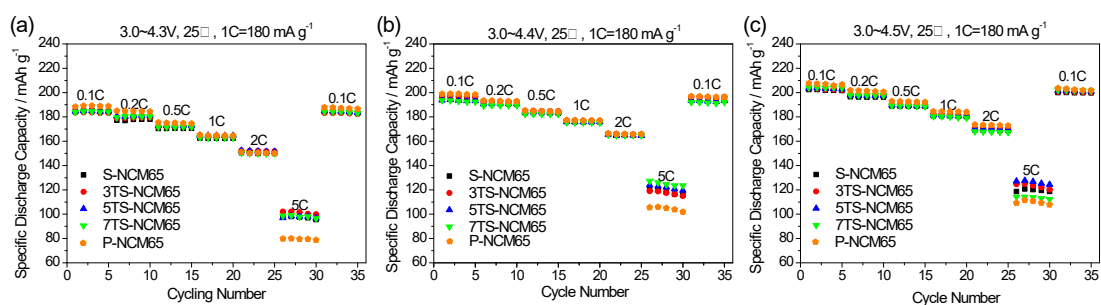

Figure. S8 Rate-performance of single-crystal samples and P-NCM65 at 25°C in the

voltage range of (a) 3.0-4.3 V, (b) 3.0-4.4 V and (c) 3.0-4.5 V, respectively

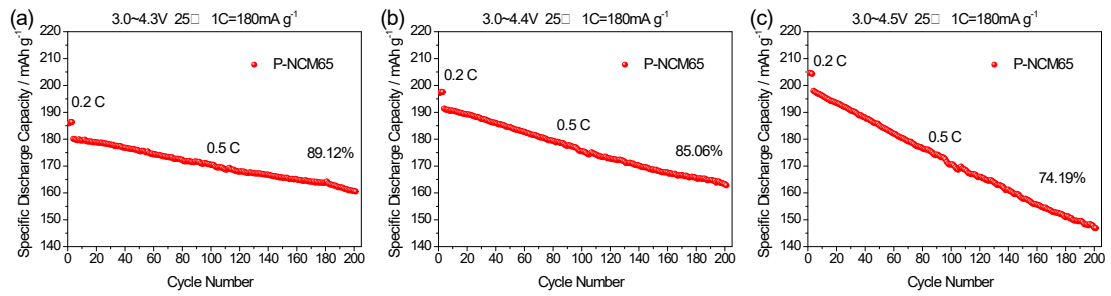

Fig. S9 Cycling performance of P-NCM65 at 25°C in the voltage range of (a) 3.0-4.3 V, (b) 3.0-4.4 V and (c) 3.0-4.5 V, respectively

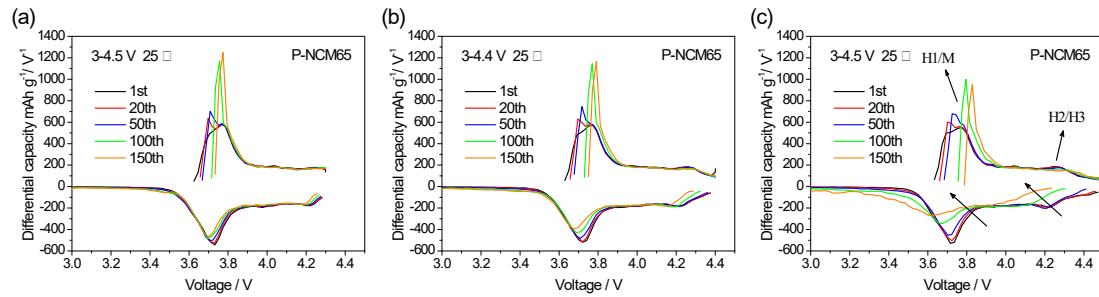

Fig. S10 dQ/dV curves of P-NCM65 at 25°C at 0.5C in the voltage range of (a) 3.0-4.3 V, (b) 3.0-4.4 V and (c) 3.0-4.5 V, respectively

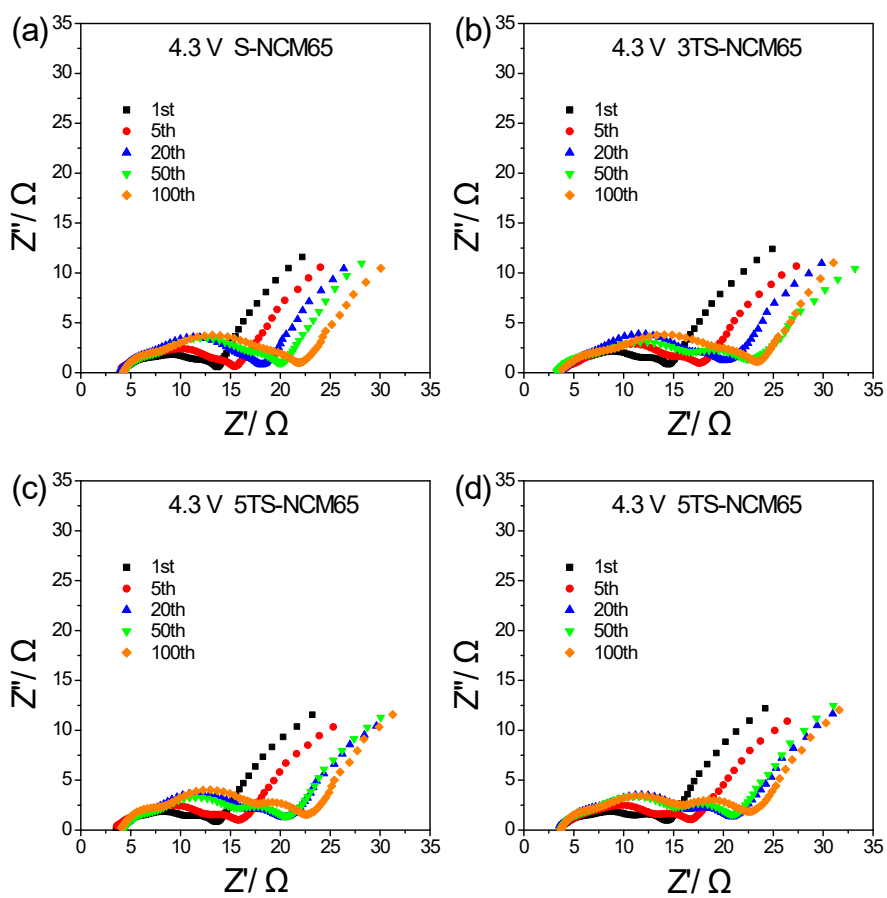

Fig. S11 Nyquist diagram of the sample at 4.3 V cut-off voltage with different cycle numbers

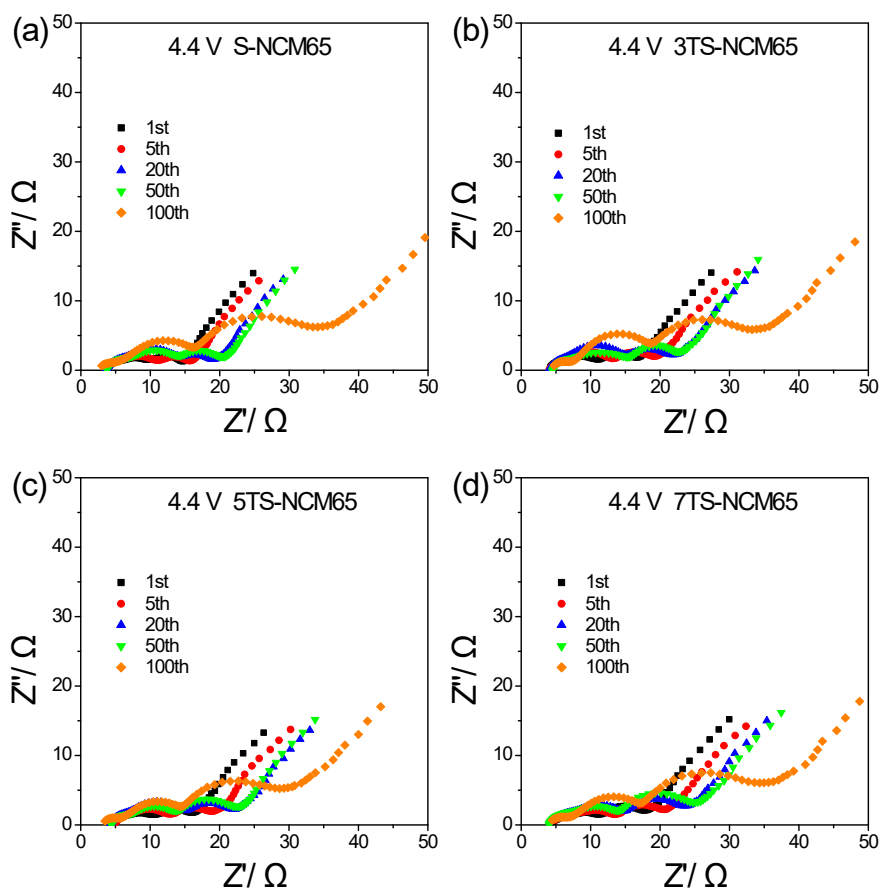

Fig. S12 Nyquist diagram of the sample at 4.3 V cut-off voltage with different cycle numbers

Table S2 EIS fitting data of S-NCM65 and 5TS-NCM65 cycling at different cut-off voltages.

| 3.0-4.3 V         |               |               |               |                  |               |               |               |                  |
|-------------------|---------------|---------------|---------------|------------------|---------------|---------------|---------------|------------------|
| Samples           | S-NCM65       |               |               |                  | 5TS-NCM65     |               |               |                  |
|                   | $R_s(\Omega)$ | $R_f(\Omega)$ | $R_e(\Omega)$ | $R_{ct}(\Omega)$ | $R_s(\Omega)$ | $R_f(\Omega)$ | $R_e(\Omega)$ | $R_{ct}(\Omega)$ |
| 1 <sup>st</sup>   | 4.67          | 3.28          | 3.83          | 2.93             | 3.53          | 3.20          | 3.98          | 3.61             |
| 5 <sup>th</sup>   | 4.05          | 3.68          | 5.63          | 3.00             | 3.65          | 3.83          | 5.34          | 3.98             |
| 20 <sup>th</sup>  | 4.11          | 3.92          | 8.56          | 3.16             | 3.87          | 3.91          | 9.69          | 4.51             |
| 50 <sup>th</sup>  | 4.49          | 3.99          | 9.46          | 4.35             | 4.32          | 3.76          | 8.19          | 5.40             |
| 100 <sup>th</sup> | 4.27          | 4.51          | 10.23         | 5.16             | 4.05          | 4.57          | 9.08          | 5.82             |

  

| 3.0-4.4 V         |               |               |               |                  |               |               |               |                  |
|-------------------|---------------|---------------|---------------|------------------|---------------|---------------|---------------|------------------|
| Samples           | S-NCM65       |               |               |                  | 5TS-NCM65     |               |               |                  |
|                   | $R_s(\Omega)$ | $R_f(\Omega)$ | $R_e(\Omega)$ | $R_{ct}(\Omega)$ | $R_s(\Omega)$ | $R_f(\Omega)$ | $R_e(\Omega)$ | $R_{ct}(\Omega)$ |
| 1 <sup>st</sup>   | 3.44          | 3.39          | 3.99          | 5.25             | 4.62          | 2.02          | 4.21          | 5.74             |
| 5 <sup>th</sup>   | 3.51          | 3.32          | 4.88          | 5.10             | 4.96          | 2.50          | 5.67          | 7.21             |
| 20 <sup>th</sup>  | 3.89          | 4.21          | 7.21          | 6.55             | 4.70          | 2.58          | 8.41          | 7.64             |
| 50 <sup>th</sup>  | 3.67          | 3.90          | 7.21          | 6.83             | 4.37          | 3.43          | 6.78          | 8.52             |
| 100 <sup>th</sup> | 2.96          | 3.16          | 10.66         | 19.67            | 3.59          | 2.84          | 8.42          | 14.87            |



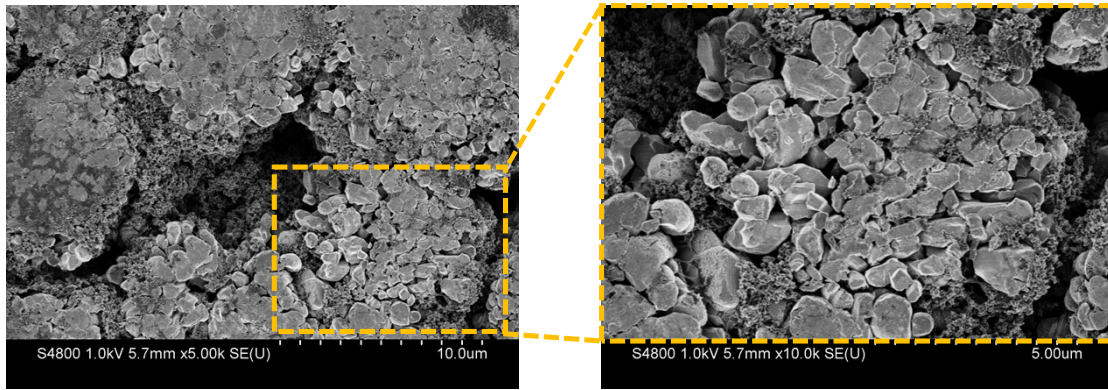

Figure. S13 SEM images of P-NCM65 after 200 cycles at different magnification

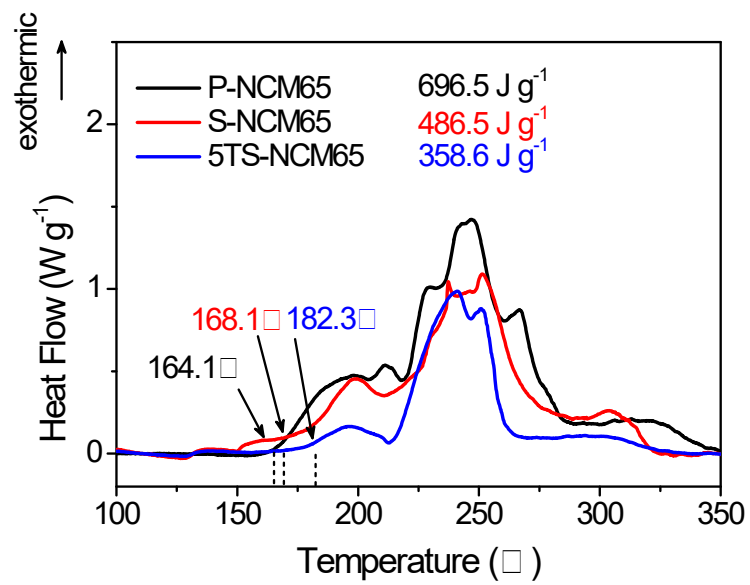

Fig. S14 DSC curves of S-NCM65, 5TS-NCM65 and P-NCM65
